# Supplementary material for: Selective hydrogenation of nitroarenes to amines by ligand-assisted Pd nanoparticles: influence of donor ligands on catalytic activity
Source: Royal Society of Chemistry journal article supplement (doi:10.1039/c8nj05932b), 2019-01-01
Supplement: c8nj05932b1.pdf [file c8nj05932b1.pdf]

## Supporting Information

### Selective hydrogenation of nitroarenes to amines by ligand assisted Pd nanoparticles: Influence of donor ligands on catalytic activity

Gauravjyoti D. Kalita<sup>a</sup>, Podma P. Sarmah<sup>a</sup>, Pallab K. Saikia<sup>b</sup>, Lakshi Saikia<sup>b</sup>, Pankaj Das<sup>b\*</sup>

<sup>a</sup>Department of Chemistry, Dibrugarh University, Dibrugarh, Assam, India, 786004

<sup>b</sup>Materials Sciences and Technology Division, CSIR-North East Institute of Science and Technology,

Jorhat, Assam, India, 785006

E-mail: pankajdas@dibru.ac.in

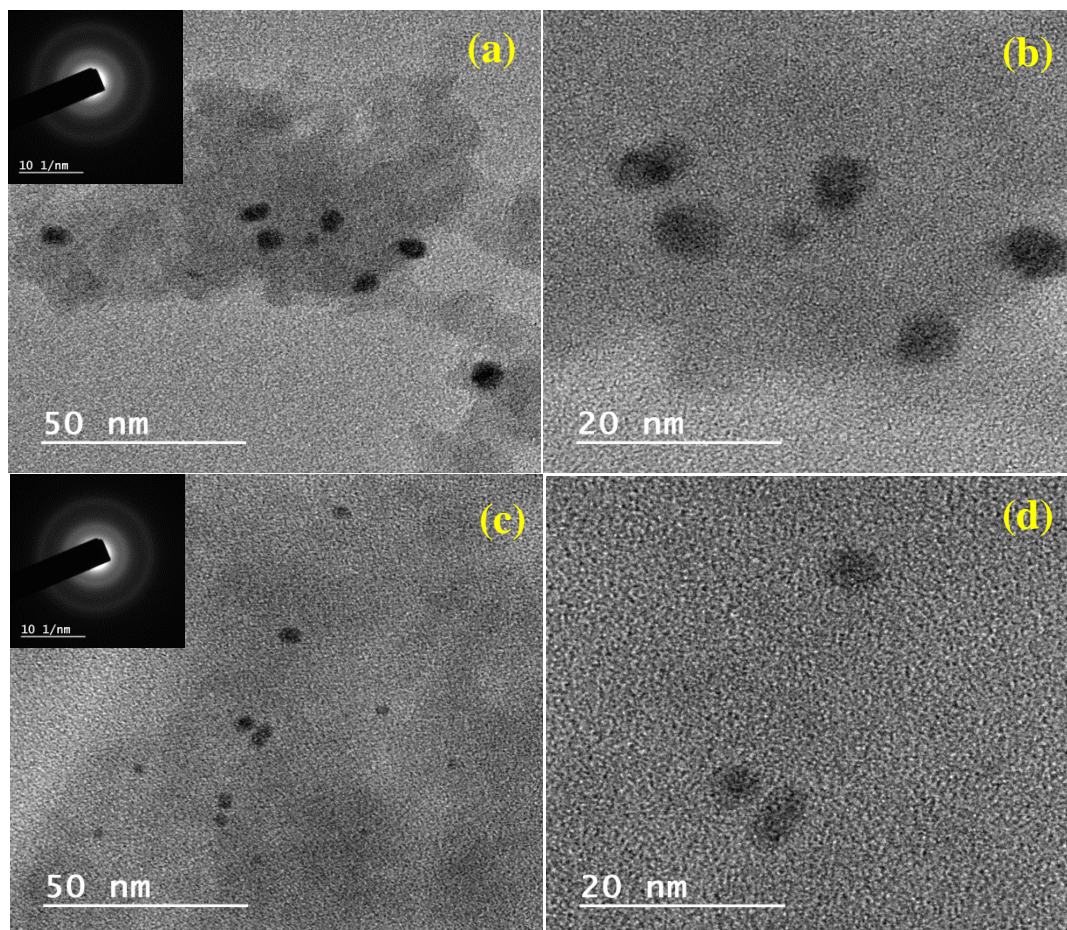

**Figure S1:** TEM images of as prepared Pd-AP@SiO<sub>2</sub> [(a), (b)] and Pd-DPPE@SiO<sub>2</sub> [(c), (d)] materials with corresponding SAED patterns [insets (a) and (c)]

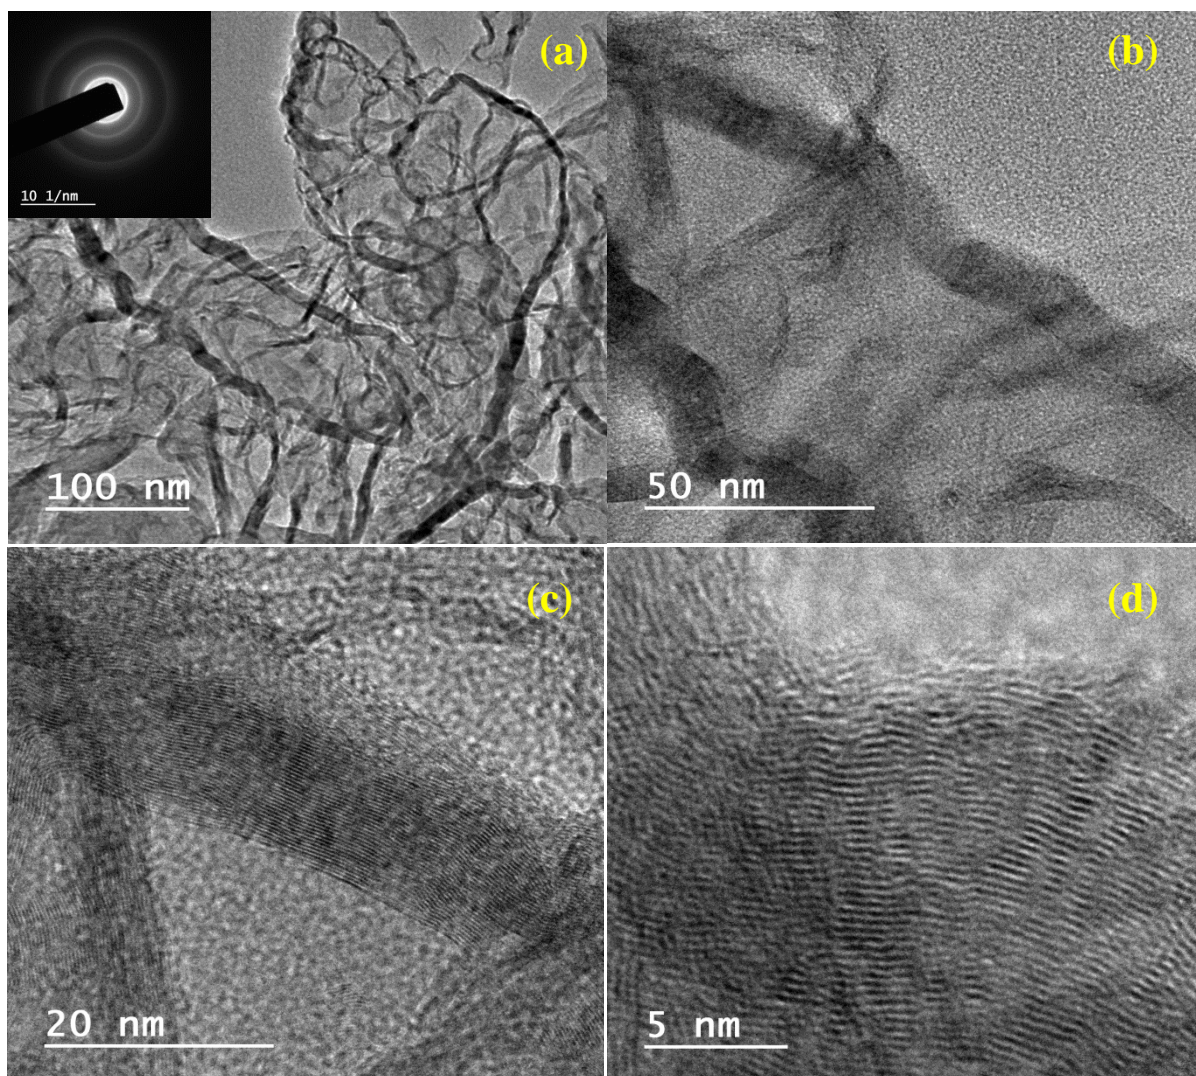

**Figure S2:** TEM images of the (a) Pd-MP@SiO<sub>2</sub> material with corresponding SAED pattern (inset), HRTEM images (b), (c) and (d) for the material depicting a crystalline structure.





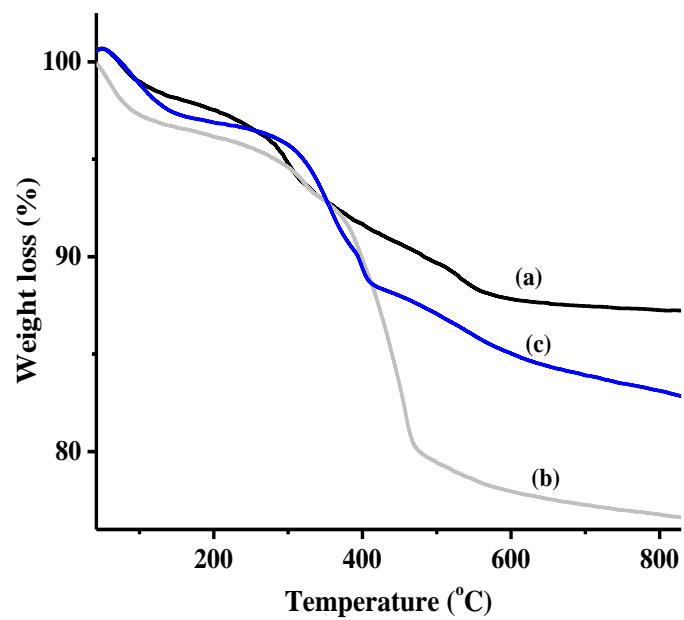

**Figure S3:** TG analysis of (a) Pd-AP@SiO<sub>2</sub>, (b) Pd-DPPE@SiO<sub>2</sub> and (c) Pd-MP@SiO<sub>2</sub> materials

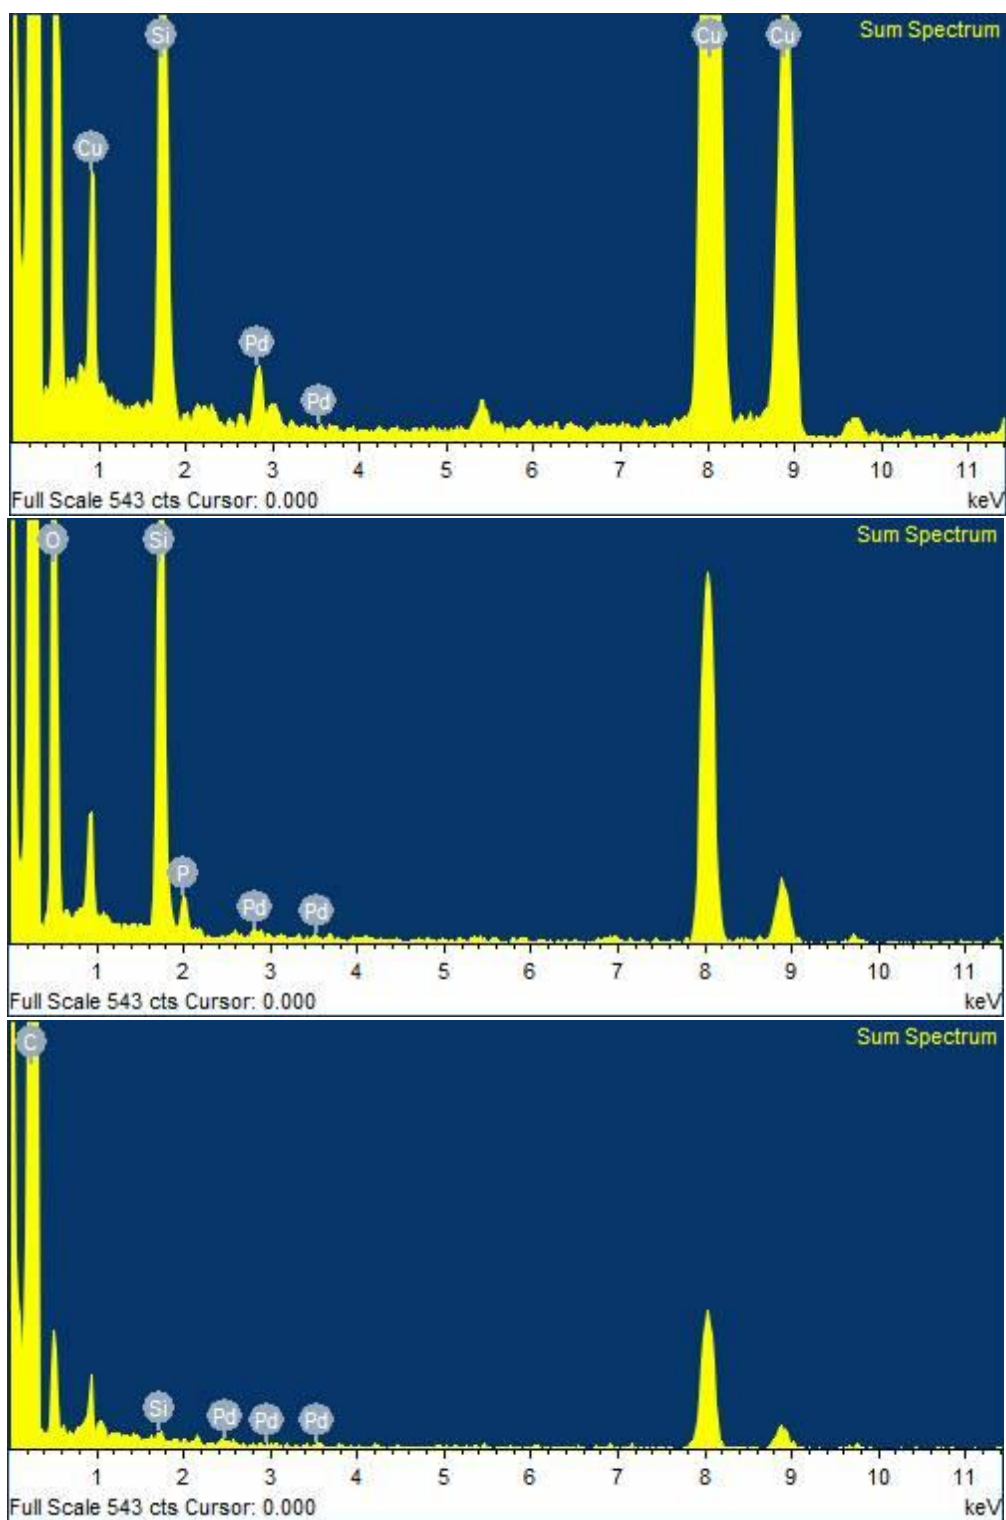

**Figure S4:** EDAX profiles of (a) Pd-AP@SiO<sub>2</sub>, (b) Pd-MP@SiO<sub>2</sub> and (c) Pd-DPPE@SiO<sub>2</sub> materials

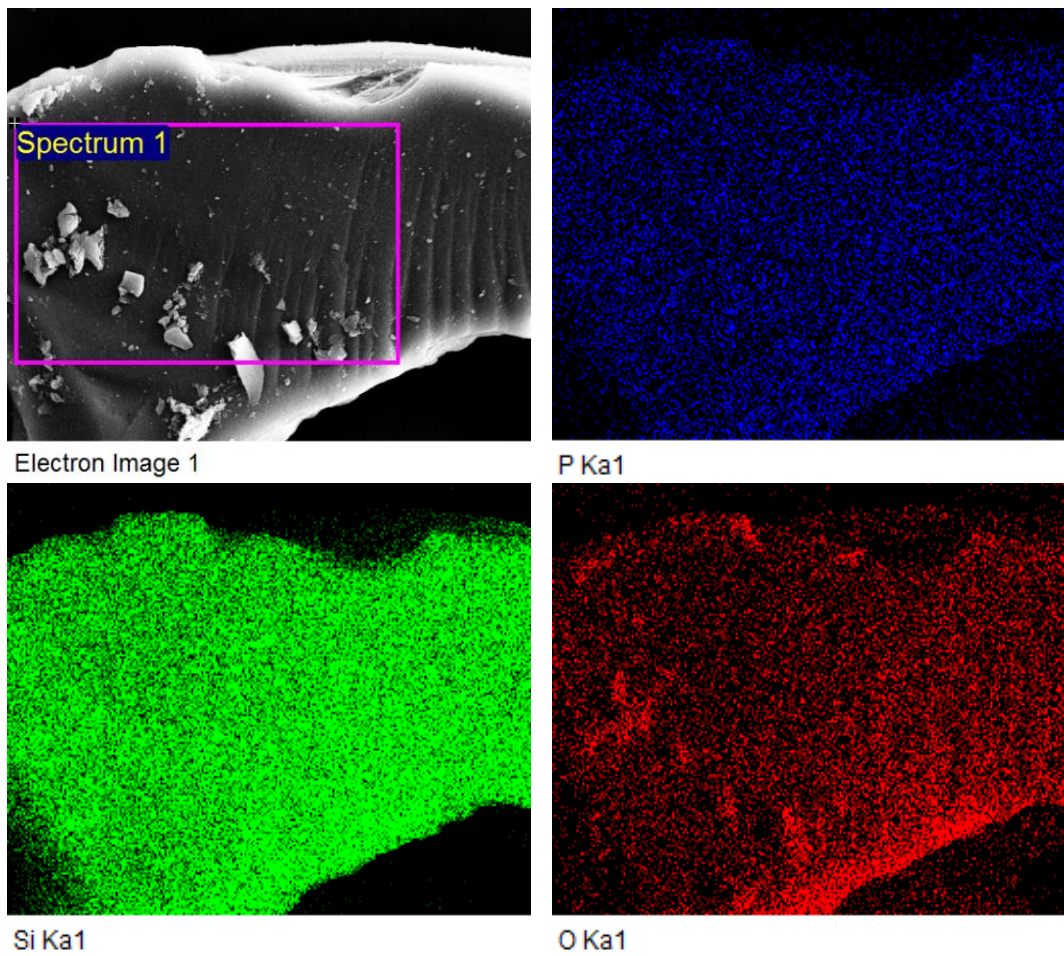

**Figure S5:** EDS elemental dot mapping images of the Pd-DPPE@SiO<sub>2</sub> material
